# Supplementary material for: A Physically Active Status Affects the Circulating Profile of Cancer-Associated miRNAs
Source: MDPI journal article supplement (doi:10.3390/diagnostics11050820), 2021-04-30
Supplement: s1 [file s1]

## Article

# A Physically Active Status Affects the Circulating Profile of Cancer-Associated miRNAs

Martina Faraldi <sup>1</sup>, Laura Gerosa <sup>2,\*</sup>, Marta Gomasca <sup>1</sup>, Veronica Sansoni <sup>1</sup>, Silvia Perego <sup>1</sup>, Ewa Ziemann <sup>3</sup>, Giuseppe Banfi <sup>1,4</sup> and Giovanni Lombardi <sup>1,3</sup>

<sup>1</sup> IRCCS Istituto Ortopedico Galeazzi, Laboratory of Experimental Biochemistry & Molecular Biology, 20161 Milano, Italy; martina.faraldi@grupposandonato.it (M.F.); marta.gomasca@grupposandonato.it (M.G.); veronica.sansoni@grupposandonato.it (V.S.); silvia.perego@grupposandonato.it (S.P.); banfi.giuseppe@unir.it (G.B.); giovanni.lombardi@grupposandonato.it (G.L.)

<sup>2</sup> Gruppo San Donato Foundation, 20122 Milano, Italy

<sup>3</sup> Department of Athletics, Strength and Conditioning, Poznań University of Physical Education, 61-871 Poznań, Poland; ziemann@awf.poznan.pl

<sup>4</sup> Vita-Salute San Raffaele University, 20132 Milano, Italy

\* Correspondence: laura.gerosa@grupposandonato.it; Tel.: +39-02166214068

**Citation:** Faraldi, M.; Gerosa, L.; Gomasca, M.; Sansoni, V.; Perego, S.; Ziemann, E.; Banfi, G.; Lombardi, G. A Physically Active Status Affects the Circulating Profile of Cancer-Associated miRNAs. *Diagnostics* **2021**, *11*, 820. <https://doi.org/10.3390/diagnostics11050820>

Academic Editor: Anastasia Malek

Received: 24 March 2021

Accepted: 29 April 2021

Published: 30 April 2021

**Publisher's Note:** MDPI stays neutral with regard to jurisdictional claims in published maps and institutional affiliations.

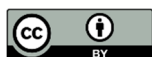

**Copyright:** © 2021 by the authors. Licensee MDPI, Basel, Switzerland. This article is an open access article distributed under the terms and conditions of the Creative Commons Attribution (CC BY) license (<http://creativecommons.org/licenses/by/4.0/>).

**Supplementary Table S1.** Fold-Change of the 179 miRNAs analyzed in trained subjects compared with sedentary subjects. In bold are reported miRNAs significantly  $\geq 2$ -fold up- or down-regulated in trained subjects compared with sedentary subject (p-value  $< 0.05$ ).

| miRNAs                 | Fold-Change   | p-value       |
|------------------------|---------------|---------------|
| <b>hsa-let-7a-5p</b>   | <b>0.147</b>  | <b>0.0346</b> |
| hsa-let-7b-3p          | Undetected    |               |
| hsa-let-7b-5p          | 1.508         | 0.1766        |
| hsa-let-7c-5p          | 0.626         | 0.4174        |
| <b>hsa-let-7d-3p</b>   | <b>0.327</b>  | <b>0.0124</b> |
| hsa-let-7d-5p          | 1.663         | 0.3932        |
| hsa-let-7e-5p          | 0.530         | 0.0076        |
| hsa-let-7f-5p          | 0.348         | 0.0566        |
| hsa-let-7g-5p          | 0.571         | 0.3725        |
| hsa-let-7i-5p          | 1.363         | 0.7046        |
| <b>hsa-miR-1</b>       | <b>32.146</b> | <b>0.0030</b> |
| hsa-miR-100-5p         | Undetected    |               |
| hsa-miR-101-3p         | 0.197         | 0.1283        |
| hsa-miR-103a-3p        | 0.113         | 0.2749        |
| hsa-miR-106a-5p        | 0.639         | 0.4608        |
| hsa-miR-106b-3p        | Undetected    |               |
| hsa-miR-106b-5p        | 0.638         | 0.5860        |
| hsa-miR-107            | 0.121         | 0.2193        |
| hsa-miR-10b-5p         | Undetected    |               |
| hsa-miR-122-5p         | 0.104         | 0.1387        |
| hsa-miR-125a-5p        | 0.508         | 0.1720        |
| hsa-miR-125b-5p        | 0.010         | 0.2153        |
| hsa-miR-1260a          | 65.646        | 0.1806        |
| <b>hsa-miR-126-3p</b>  | <b>0.494</b>  | <b>0.0001</b> |
| hsa-miR-126-5p         | 1.287         | 0.6920        |
| <b>hsa-miR-127-3p</b>  | <b>33.726</b> | <b>0.0336</b> |
| hsa-miR-128-3p         | Undetected    |               |
| hsa-miR-130a-3p        | 44.819        | 0.0542        |
| hsa-miR-130b-3p        | 46.322        | 0.0681        |
| hsa-miR-132-3p         | 83.506        | 0.1379        |
| hsa-miR-133a-3p        | Undetected    |               |
| hsa-miR-133b           | Undetected    |               |
| hsa-miR-136-3p         | Undetected    |               |
| hsa-miR-136-5p         | Undetected    |               |
| hsa-miR-139-5p         | 0.373         | 0.1388        |
| hsa-miR-140-3p         | 1.292         | 0.7052        |
| <b>hsa-miR-140-5p</b>  | <b>0.016</b>  | <b>0.0021</b> |
| hsa-miR-141-3p         | Undetected    |               |
| hsa-miR-142-3p         | 0.081         | 0.1333        |
| hsa-miR-142-5p         | 0.456         | 0.1198        |
| hsa-miR-143-3p         | Undetected    |               |
| hsa-miR-144-3p         | 0.077         | 0.3523        |
| hsa-miR-144-5p         | 47.871        | 0.0885        |
| hsa-miR-145-5p         | 0.501         | 0.1040        |
| hsa-miR-146a-5p        | 0.859         | 0.7440        |
| hsa-miR-146b-5p        | 0.821         | 0.4490        |
| hsa-miR-148a-3p        | 0.336         | 0.3043        |
| <b>hsa-miR-148b-3p</b> | <b>32.664</b> | <b>0.0134</b> |

|                        |               |               |
|------------------------|---------------|---------------|
| hsa-miR-150-5p         | 0.998         | 0.9955        |
| hsa-miR-151a-3p        | 2.649         | 0.4233        |
| hsa-miR-151a-5p        | 0.355         | 0.2331        |
| hsa-miR-152-3p         | 0.670         | 0.5150        |
| hsa-miR-154-5p         | undetected    |               |
| <b>hsa-miR-155-5p</b>  | <b>32.980</b> | <b>0.0003</b> |
| hsa-miR-15a-5p         | 1.045         | 0.9654        |
| hsa-miR-15b-3p         | 0.756         | 0.3797        |
| hsa-miR-15b-5p         | 2.689         | 0.4935        |
| <b>hsa-miR-16-2-3p</b> | <b>34.059</b> | <b>0.028</b>  |
| hsa-miR-16-5p          | 1.246         | 0.5375        |
| hsa-miR-17-5p          | 4.460         | 0.5445        |
| <b>hsa-miR-181a-5p</b> | 0.015         | 0.0002        |
| hsa-miR-185-5p         | 0.308         | 0.1002        |
| <b>hsa-miR-186-5p</b>  | <b>33.453</b> | <b>0.0285</b> |
| hsa-miR-18a-5p         | 0.813         | 0.6658        |
| hsa-miR-18b-5p         | 0.315         | 0.2836        |
| hsa-miR-191-5p         | 1.512         | 0.5773        |
| hsa-miR-192-5p         | 0.623         | 0.2625        |
| hsa-miR-193a-5p        | Undetected    |               |
| hsa-miR-194-5p         | 0.934         | 0.7713        |
| hsa-miR-195-5p         | Undetected    |               |
| hsa-miR-197-3p         | 1.382         | 0.3775        |
| hsa-miR-199a-3p        | 0.831         | 0.4247        |
| <b>hsa-miR-199a-5p</b> | <b>0.008</b>  | <b>0.0216</b> |
| hsa-miR-19a-3p         | 0.355         | 0.2259        |
| hsa-miR-19b-3p         | 0.287         | 0.1947        |
| hsa-miR-200a-3p        | Undetected    |               |
| hsa-miR-200c-3p        | 53.405        | 0.2469        |
| hsa-miR-205-5p         | Undetected    |               |
| hsa-miR-208a-3p        | Undetected    |               |
| hsa-miR-20a-5p         | 0.672         | 0.5256        |
| <b>hsa-miR-20b-5p</b>  | <b>33.930</b> | <b>0.0373</b> |
| hsa-miR-210-3p         | Undetected    |               |
| hsa-miR-2110           | 46.391        | 0.0811        |
| hsa-miR-215-5p         | 0.371         | 0.1272        |
| hsa-miR-21-5p          | 0.969         | 0.8960        |
| hsa-miR-221-3p         | 0.220         | 0.1396        |
| hsa-miR-222-3p         | 0.699         | 0.4092        |
| hsa-miR-223-3p         | 1.005         | 0.9899        |
| hsa-miR-223-5p         | 0.567         | 0.2899        |
| hsa-miR-22-3p          | 0.383         | 0.1559        |
| hsa-miR-22-5p          | Undetected    |               |
| hsa-miR-23a-3p         | 0.994         | 0.5644        |
| hsa-miR-23b-3p         | 1.674         | 0.4277        |
| hsa-miR-24-3p          | 1.329         | 0.4187        |
| hsa-miR-25-3p          | 1.311         | 0.4434        |
| hsa-miR-26a-5p         | 1.436         | 0.7172        |
| hsa-miR-26b-5p         | 0.496         | 0.1636        |
| hsa-miR-27a-3p         | 3.069         | 0.2764        |
| <b>hsa-miR-27b-3p</b>  | <b>0.409</b>  | <b>0.0146</b> |
| <b>hsa-miR-28-3p</b>   | <b>33.374</b> | <b>0.0011</b> |
| hsa-miR-28-5p          | 0.542         | 0.0023        |
| <b>hsa-miR-29a-3p</b>  | <b>0.015</b>  | <b>0.0006</b> |
| <b>hsa-miR-29b-3p</b>  | <b>34.476</b> | <b>0.0048</b> |
| hsa-miR-29c-3p         | 66.131        | 0.1851        |

|                        |               |               |
|------------------------|---------------|---------------|
| hsa-miR-301a-3p        | 0.184         | 0.0905        |
| hsa-miR-30a-5p         | undetected    |               |
| hsa-miR-30b-5p         | 0.291         | 0.1936        |
| hsa-miR-30c-5p         | 0.188         | 0.0830        |
| hsa-miR-30d-5p         | 1.656         | 0.1800        |
| <b>hsa-miR-30e-3p</b>  | <b>32.977</b> | <b>0.0004</b> |
| hsa-miR-30e-5p         | 0.377         | 0.1258        |
| <b>hsa-miR-320a</b>    | <b>2.378</b>  | <b>0.0183</b> |
| <b>hsa-miR-320b</b>    | <b>3.037</b>  | <b>0.0128</b> |
| hsa-miR-320c           | 3.268         | 0.2028        |
| hsa-miR-324-3p         | 0.561         | 0.0861        |
| hsa-miR-324-5p         | 52.154        | 0.2389        |
| hsa-miR-32-5p          | 0.875         | 0.7812        |
| <b>hsa-miR-326</b>     | <b>34.710</b> | <b>0.0027</b> |
| hsa-miR-328-3p         | 1.154         | 0.8681        |
| hsa-miR-331-3p         | 0.010         | 0.2031        |
| <b>hsa-miR-335-3p</b>  | <b>33.395</b> | <b>0.0274</b> |
| hsa-miR-335-5p         | Undetected    |               |
| hsa-miR-338-3p         | Undetected    |               |
| hsa-miR-339-3p         | Undetected    |               |
| hsa-miR-339-5p         | 0.534         | 0.1940        |
| hsa-miR-33a-5p         | Undetected    |               |
| hsa-miR-342-3p         | 0.541         | 0.3048        |
| hsa-miR-34a-5p         | Undetected    |               |
| hsa-miR-361-5p         | 79.726        | 0.1168        |
| hsa-miR-362-3p         | Undetected    |               |
| hsa-miR-363-3p         | 0.725         | 0.3578        |
| hsa-miR-365a-3p        | Undetected    |               |
| hsa-miR-374a-5p        | 47.266        | 0.0692        |
| hsa-miR-374b-5p        | 0.848         | 0.4592        |
| hsa-miR-375            | 0.326         | 0.2856        |
| <b>hsa-miR-376a-3p</b> | <b>32.728</b> | <b>0.0146</b> |
| hsa-miR-376c-3p        | 44.991        | 0.1828        |
| <b>hsa-miR-378a-3p</b> | <b>0.031</b>  | <b>0.0137</b> |
| <b>hsa-miR-382-5p</b>  | <b>33.174</b> | <b>0.0010</b> |
| <b>hsa-miR-409-3p</b>  | <b>35.541</b> | <b>0.0005</b> |
| <b>hsa-miR-421</b>     | <b>32.351</b> | <b>0.0071</b> |
| <b>hsa-miR-423-3p</b>  | <b>33.454</b> | <b>0.0285</b> |
| hsa-miR-423-5p         | 1.582         | 0.2810        |
| <b>hsa-miR-424-5p</b>  | <b>0.031</b>  | <b>0.0154</b> |
| hsa-miR-425-3p         | 45.356        | 0.0771        |
| hsa-miR-425-5p         | 1.364         | 0.5897        |
| hsa-miR-451a           | 0.213         | 0.3515        |
| hsa-miR-454-3p         | 45.439        | 0.0577        |
| hsa-miR-483-5p         | 0.678         | 0.4665        |
| hsa-miR-484            | 0.491         | 0.1685        |
| hsa-miR-485-3p         | Undetected    |               |
| hsa-miR-486-5p         | 4.640         | 0.1726        |
| <b>hsa-miR-495-3p</b>  | <b>32.963</b> | <b>0.0192</b> |
| hsa-miR-497-5p         | Undetected    |               |
| hsa-miR-501-3p         | Undetected    |               |
| <b>hsa-miR-502-3p</b>  | <b>32.979</b> | <b>0.0195</b> |
| <b>hsa-miR-505-3p</b>  | <b>33.851</b> | <b>0.0358</b> |
| hsa-miR-532-3p         | Undetected    |               |
| hsa-miR-532-5p         | 0.552         | 0.0264        |
| hsa-miR-543            | Undetected    |               |

---

|                       |               |               |
|-----------------------|---------------|---------------|
| <b>hsa-miR-574-3p</b> | <b>0.256</b>  | <b>0.0016</b> |
| hsa-miR-584-5p        | 51.916        | 0.0511        |
| hsa-miR-590-5p        | 0.675         | 0.1974        |
| <b>hsa-miR-629-5p</b> | <b>34.614</b> | <b>0.0011</b> |
| hsa-miR-652-3p        | 0.333         | 0.2859        |
| hsa-miR-660-5p        | 51.569        | 0.2351        |
| hsa-miR-7-1-3p        | Undetected    |               |
| hsa-miR-7-5p          | Undetected    |               |
| hsa-miR-766-3p        | 0.405         | 0.1117        |
| <b>hsa-miR-874-3p</b> | <b>32.953</b> | <b>0.0190</b> |
| hsa-miR-877-5p        | 46.335        | 0.0783        |
| hsa-miR-885-5p        | Undetected    |               |
| hsa-miR-92a-3p        | 4.977         | 0.2210        |
| hsa-miR-92b-3p        | Undetected    |               |
| <b>hsa-miR-93-3p</b>  | <b>32.869</b> | <b>0.0173</b> |
| hsa-miR-93-5p         | 0.570         | 0.3757        |
| hsa-miR-99a-5p        | Undetected    |               |
| hsa-miR-99b-5p        | 0.486         | 0.1793        |

---
